# Supplementary material
Source: PubMed Central journal article supplement (PMC2757215)

**Supplemental figure 1. Rat InsP<sub>3</sub>R2 is phosphorylated in response to raising cAMP in metabolically labeled COS-7 cells.** COS-7 cells were transiently transfected with cDNA for rat InsP<sub>3</sub>R2. 36 hours after transfection, cells were metabolically labeled with <sup>32</sup>PO<sub>4</sub> prior to forskolin treatment, immunoprecipitation and PAGE. A, shows the phosphorimage of a dried gel loaded with samples from rat InsP<sub>3</sub>R2 expressing cells. Greater <sup>32</sup>P incorporation into a ~250 kDa band in the forskolin-treated transfected samples indicated phosphorylation of InsP<sub>3</sub>R2. The lower panel is a western blot of the rehydrated gel probed with α-InsP<sub>3</sub>R2 antiserum indicating equal amounts of InsP<sub>3</sub>R2 in each sample and clearly demonstrates that expressed InsP<sub>3</sub>R2 can be distinguished from endogenous receptor.

# Supplemental figure 1

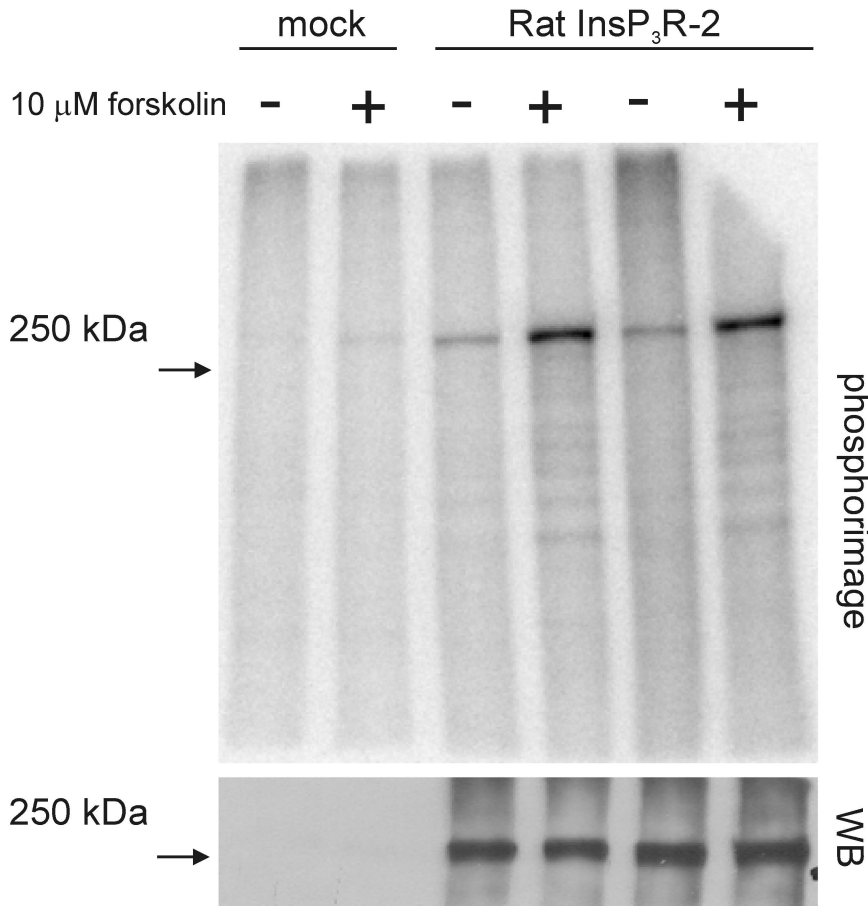

Supplement: supp_M109.010132_jbc.M109.010132-1.pdf [file supp_M109.010132_jbc.M109.010132-1.pdf]
